# Supplementary material for: Alteration of the Respiratory Microbiome in Hospitalized Patients with Asthma–COPD Overlap during and after an Exacerbation
Source: MDPI journal article supplement (doi:10.3390/jcm12062118), 2023-03-08
Supplement: s1 [file s1]

## Supplementary Data

**Table S1. Primers used for amplification of the bacterial 16S rRNA gene.**

| Primer name    | Primer sequence (5' - 3') |
|----------------|---------------------------|
| 515F (forward) | GTGCCAGCMGCCGCGGTAA       |
| 806R (reverse) | GGACTACHVGGGTWTCTAAT      |

**Table S2. Master mix preparation for the PCR 1 step.**

| Reagent                      | Volume                  |
|------------------------------|-------------------------|
| 5x Phusion Hifi Buffer       | 5µl                     |
| dNTP (10 mM)                 | 0.5µl                   |
| V4 primer mix (10µM)         | 1µl                     |
| Phusion HS II polymerase     | 0.25µl                  |
| DEPC (molecular grade) water | Up to 25µl per reaction |

**Table S3. PCR cycling conditions for the pre-amplification (PCR 1) step.**

| Cycle step           | Temperature (°C) | Time | No. of cycles |
|----------------------|------------------|------|---------------|
| Initial denaturation | 98°C             | 30s  | 1             |
| Denaturation         | 98°C             | 10s  | 10            |
| Annealing            | 52°C             | 30s  |               |
| Extension            | 72°C             | 20s  |               |
| Final extension      | 72°C             | 5min | 1             |
| Hold at 4°C          |                  |      |               |

**Table S4. Clean-up process of PCR products for PCR 1 to PCR 4 steps.**

| <b>Step A: DNA binding to magnetic beads</b>                   |                                                                                                                                                                                                                                                                                             |
|----------------------------------------------------------------|---------------------------------------------------------------------------------------------------------------------------------------------------------------------------------------------------------------------------------------------------------------------------------------------|
| 1.                                                             | vortex magnetic beads well before use to resuspend any magnetic beads that may have settled.                                                                                                                                                                                                |
| 2.                                                             | Aliquot 15- $\mu$ l of Axygen beads to 10- $\mu$ l of PCR product into a sterile 96-well plate.<br><b>PCR 3 step:</b> 17.5- $\mu$ l of Axygen beads was added to 10- $\mu$ l of the PCR product.<br><b>PCR 4 step:</b> 35- $\mu$ l of Axygen beads and the entire PCR product was used.     |
| 3.                                                             | Mix well by repeated pipetting and incubate at room temperature for 5-min.                                                                                                                                                                                                                  |
| 4.                                                             | Place the reaction plate onto the IMAG separation device and wait until the liquid become clear.                                                                                                                                                                                            |
| 5.                                                             | Remove the clear liquid from the plate and discard.                                                                                                                                                                                                                                         |
| <b>Step B: Beads washing to remove salt and contaminants</b>   |                                                                                                                                                                                                                                                                                             |
| 1.                                                             | Add 180- $\mu$ l of 70% ethanol (EtOH) to each well of the reaction plate and incubate for 30sec at room temperature.                                                                                                                                                                       |
| 2.                                                             | Remove the 70% EtOH from each well and discard (this step was repeated twice).                                                                                                                                                                                                              |
| 3.                                                             | Air-dry the beads at room temperature for no more than 5-min. over drying the magnetic beads was avoided as over drying will cause the beads to crack and lead to decreased elution efficiency.                                                                                             |
| 4.                                                             | We ensured that all the EtOH has been removed from each well.                                                                                                                                                                                                                               |
| 5.                                                             | Add 11- $\mu$ l of molecular grade water (DEPC H <sub>2</sub> O) to each well.<br><b>PCR 3 step:</b> 16- $\mu$ l of DEPC H <sub>2</sub> O.<br><b>PCR 4 step:</b> 50- $\mu$ l of DEPC H <sub>2</sub> O                                                                                       |
| 6.                                                             | Remove reaction plate from the IMAG separation device and mix well by gentle vortex to resuspend the magnetic beads.                                                                                                                                                                        |
| 7.                                                             | Place the reaction plate onto the IMAG separation device for 1min to separate the beads from the solution.                                                                                                                                                                                  |
| <b>Step C: Elute purified PCR products from magnetic beads</b> |                                                                                                                                                                                                                                                                                             |
|                                                                | Transfer 10- $\mu$ l of the cleaned-up PCR product to a sterile 96 well plate for the next PCR step.<br><b>PCR 3 step:</b> 15- $\mu$ l of the cleaned-up PCR product were transferred.<br><b>PCR 4 step:</b> all of the cleaned-up PCR product were transferred to a sterile 96-well plate. |

This table represents the cleaned-up process of PCR products using AxyPrep Mag PCR Clean-up kit (Life Technologies, UK). The steps are common for PCR 1 to PCR 4 steps, unless otherwise specified.

**Table S5. Master mix preparation for reverse and forward tagging (PCR 2 and PCR 3) steps.**

| Reagent                           | Volume |
|-----------------------------------|--------|
| 5x Phusion Hifi Buffer            | 5µl    |
| dNTP (10 mM)                      | 0.5µl  |
| Reverse_MT_tag Primer mix (0.5µM) | 2µl    |
| Phusion HS II polymerase          | 0.25µl |
| DEPC water                        | 7.25µl |

**Table S6. PCR cycling conditions for the PCR 2 and PCR 3 steps.**

| Cycle step           | Temperature | Time | No. of cycles |
|----------------------|-------------|------|---------------|
| Initial denaturation | 98°C        | 60s  | 1             |
| Denaturation         | 98°C        | 10s  | 1             |
| Annealing            | 50°C        | 30s  |               |
| Extension            | 72°C        | 60s  |               |
| hold at 4°C          |             |      |               |

**Table S7. Master mix preparation for the PCR 4 step.**

| Reagent                              | Volume |
|--------------------------------------|--------|
| 5x Phusion Hifi Buffer               | 10µl   |
| dNTP (10 mM)                         | 1µl    |
| forward primer (SEQ_V4_F)            | 2.5µl  |
| reverse primer (INDEX_R_bc1 to bc96) | 2.5µl  |
| Phusion HS II polymerase             | 0.5µl  |
| DEPC water                           | 7.25µl |

**Table S8. PCR cycling conditions for the PCR 4 step.**

| Cycle step           | Temperature | Time | No. of cycles |
|----------------------|-------------|------|---------------|
| Initial denaturation | 98°C        | 30   | 1             |
| Denaturation         | 98°C        | 10   | 34            |
| Annealing            | 63°C        | 30   |               |
| Extension            | 72°C        | 30   |               |
| hold at 4°C          |             |      |               |
